# Supplementary material for: Digital research environments: a requirements analysis
Source: Royal Society of Chemistry journal article supplement (doi:10.1039/d2dd00121g), 2023-01-01
Supplement: d2dd00121g1.pdf [file d2dd00121g1.pdf]

## E. DRN Features

In order to ascertain what features users would want from a DRN, we collated together desired features from three different sources:

- **Survey Results:** We asked users several questions that could elicit desired features, including how technology could make their life easier, what features they would perceive to be the most important for a DRN, and the limitations and barriers they currently face.
- **User Stories:** As demonstrated in Section 2, part of the research for this case study was to produce a large number of storyboards and flows based on user roles and requirements. The features detailed in these were also extracted for the purpose of this exercise.
- **Mural Boards:** During the PSDI partner meetings, several Mural Boards were set up for collaborative use during the meetings for partners and team members to brainstorm about potential functionality and features. These features were also extracted from these different Mural Boards.

The full list of features have been categorised twice, into high level categories and sub categories. Table E. 1 shows the full breakdown of these features and their categories:

Table E. 1: Categorised list of features obtained from engagement activities

| High Level Category                 | Feature Category | Feature                                                                                                                                                                                                                                           |
|-------------------------------------|------------------|---------------------------------------------------------------------------------------------------------------------------------------------------------------------------------------------------------------------------------------------------|
| Coding Support                      | Coding           | Code testing                                                                                                                                                                                                                                      |
| Coding Support                      | Coding           | Code to deal with data                                                                                                                                                                                                                            |
| Coding Support                      | Coding           | Collaborative coding                                                                                                                                                                                                                              |
| Coding Support                      | Coding           | Document Code                                                                                                                                                                                                                                     |
| Coding Support                      | Coding           | Record process of developing Code                                                                                                                                                                                                                 |
| Coding Support                      | Coding           | Record process of developing model/simulation                                                                                                                                                                                                     |
| Coding Support                      | Coding           | Translation of interactive command-line testing of parameters into a script (including understanding 'delete last thing, it didn't work'), and script documentation generation suitable for users (topic-based, indexed) not just for developers. |
| Coding Support                      | Versioning       | Establish version of DRN                                                                                                                                                                                                                          |
| Coding Support                      | Versioning       | Version control                                                                                                                                                                                                                                   |
| Collaboration & Management Features | Auditing         | Audit Trails                                                                                                                                                                                                                                      |
| Collaboration & Management Features | Auditing         | Lock plans and risk assessments                                                                                                                                                                                                                   |
| Collaboration & Management Features | Auditing         | Mark as audited                                                                                                                                                                                                                                   |
| Collaboration & Management Features | Auditing         | Moderation: review / approve / reject / rate all data/Code/plans/etc                                                                                                                                                                              |
| Collaboration & Management Features | Auditing         | Protect Intellectual Property rights                                                                                                                                                                                                              |
| Collaboration & Management Features | Auditing         | Reconfigure notebook to share when experiment is marked as complete/approved                                                                                                                                                                      |

|                                     |                 |                                                   |
|-------------------------------------|-----------------|---------------------------------------------------|
| Collaboration & Management Features | Auditing        | Review and rate experiment                        |
| Collaboration & Management Features | Auditing        | Review process / data for validity                |
| Collaboration & Management Features | Auditing        | See activity logs                                 |
| Collaboration & Management Features | Auditing        | See when notebook was last audited                |
| Collaboration & Management Features | Auditing        | Sign off entries                                  |
| Collaboration & Management Features | Comments        | Configurable comment capabilities                 |
| Collaboration & Management Features | Notifications   | Configurable notifications for all changes        |
| Collaboration & Management Features | Subscribe       | Have sign up button for notebook                  |
| Collaboration & Management Features | Subscribe       | Register interest in projects                     |
| Collaboration & Management Features | Subscribe       | Subscribe to other researchers/notebooks/projects |
| Collaboration & Management Features | Team Management | Bulletin board / forum style space                |
| Collaboration & Management Features | Team Management | Create a homepage for notebook                    |
| Collaboration & Management Features | Team Management | Message board                                     |
| Collaboration & Management Features | Team Management | Page statistics                                   |
| Collaboration & Management Features | Team Management | Plan allocation of capacity                       |
| Collaboration & Management Features | Team Management | Recent activity feed                              |
| Collaboration & Management Features | Team Management | See overview of research                          |
| Collaboration & Management Features | Team Management | Share an update on a notebook                     |
| Collaboration & Management Features | Team Management | Task Management                                   |
| Collaboration & Management Features | Team Management | Team communication                                |
| Collaboration & Management Features | Team Management | Team homepage for information in the same place   |
| Collaboration & Management Features | Team Management | Team leaders control data of group                |
| Collaboration & Management Features | Team Management | Team notebooks                                    |
| Collaboration & Management Features | Team Management | Track meetings and progress                       |
| Collaboration & Management Features | Team Management | View collaborators files                          |

|                         |   |                  |                                                              |
|-------------------------|---|------------------|--------------------------------------------------------------|
| Customisation Extension | & | Personalisable   | Add own plugins                                              |
| Customisation Extension | & | Personalisable   | Create user profiles                                         |
| Customisation Extension | & | Personalisable   | Personalisable                                               |
| Customisation Extension | & | Personalisable   | Tailor system to research domain / researcher                |
| Data Features           |   | API Access       | API access to data                                           |
| Data Features           |   | Data Access      | Authentication covers login, data permissions etc.           |
| Data Features           |   | Data Access      | Data Access controls with different levels                   |
| Data Features           |   | Data Access      | See who is accessing data                                    |
| Data Features           |   | Data Conversion  | Conversion tool                                              |
| Data Features           |   | Data Conversion  | Data format converter                                        |
| Data Features           |   | Data Conversion  | Data ingest processes                                        |
| Data Features           |   | Data Exchange    | Data exchange platform                                       |
| Data Features           |   | Data Integration | Collate together experimental and simulation data            |
| Data Features           |   | Data Integration | Combine data across a team                                   |
| Data Features           |   | Data Integration | Combine data from multiple sources                           |
| Data Features           |   | Data Integration | Easily combining data from multiple sources                  |
| Data Features           |   | Data Management  | Central database for output data                             |
| Data Features           |   | Data Management  | Create data management plan                                  |
| Data Features           |   | Data Management  | Curation of existing data resources                          |
| Data Features           |   | Data Management  | Define data processing pipeline                              |
| Data Features           |   | Data Management  | Platform for recording and managing data                     |
| Data Features           |   | Data Quality     | Assurance on quality of data                                 |
| Data Features           |   | Data Quality     | Criteria to categorise resource as trusted                   |
| Data Features           |   | Data Quality     | Quality check data                                           |
| Data Features           |   | Data Retention   | Perserve data indefinitely                                   |
| Data Features           |   | Data Retention   | Remove obsolete data offline / soft delete                   |
| Data Features           |   | Data Retention   | Store data for a specified period of time                    |
| Data Features           |   | Data Security    | Data Security                                                |
| Data Features           |   | Data Security    | Secure storage, backup and archives                          |
| Data Features           |   | Data Standards   | Data provided in clear and accessible formats                |
| Data Features           |   | Data Standards   | Enforce consistent standards.                                |
| Data Features           |   | Data Standards   | Ensure integrity of data and metadata                        |
| Data Features           |   | Data Standards   | Have a universal control and data output language            |
| Data Features           |   | Data Standards   | Shim layers as a common interface                            |
| Data Features           |   | Data Standards   | Standardised file formats that work and everyone adheres to. |
| Data Features           |   | Data Standards   | Standardised methods of referring to chemicals               |
| Data Features           |   | Data Standards   | Use domain standards                                         |

|                 |              |                                                                                                                                                                                                                                                                       |                                                                    |
|-----------------|--------------|-----------------------------------------------------------------------------------------------------------------------------------------------------------------------------------------------------------------------------------------------------------------------|--------------------------------------------------------------------|
| Data Features   | Data Storage | Archive at the time of creation                                                                                                                                                                                                                                       |                                                                    |
| Data Features   | Data Storage | Archive Notebook                                                                                                                                                                                                                                                      |                                                                    |
| Data Features   | Data Storage | Automatic saves                                                                                                                                                                                                                                                       |                                                                    |
| Data Features   | Data Storage | Backup/archive                                                                                                                                                                                                                                                        |                                                                    |
| Data Features   | Data Storage | Can handle large datasets                                                                                                                                                                                                                                             |                                                                    |
| Data Features   | Data Storage | Permanent storage options for data. Current limitation of storage providers, i.e. Google, Amazon, Dropbox, etc. is the issue that if you close or lose the account, access to previous uploads is also revoked -- can't refer to them for access to data in articles. |                                                                    |
| Data Features   | Data Storage | Secure storage, backup and archives                                                                                                                                                                                                                                   |                                                                    |
| Data Features   | Data Support | Deal with all different stages of data (raw, cleaned, processed, analysed)                                                                                                                                                                                            |                                                                    |
| Data Features   | Data Support | Download and utilise catalog data                                                                                                                                                                                                                                     |                                                                    |
| Data Features   | Data Support | Drag data from other resources into DRN                                                                                                                                                                                                                               |                                                                    |
| Data Features   | Data Support | Include data from other software                                                                                                                                                                                                                                      |                                                                    |
| Data Features   | FAIR         | Data curation for FAIR                                                                                                                                                                                                                                                |                                                                    |
| Data Features   | FAIR         | Publishing FAIR data                                                                                                                                                                                                                                                  |                                                                    |
| Data Features   | Identifiers  | Link data on chemical identity                                                                                                                                                                                                                                        |                                                                    |
| Data Features   | Identifiers  | Link data using standard identifiers                                                                                                                                                                                                                                  |                                                                    |
| Data Features   | Identifiers  | Link to third party data through identifiers                                                                                                                                                                                                                          |                                                                    |
| Data Features   | Identifiers  | Link together experiments and samples and data through Unique IDs                                                                                                                                                                                                     |                                                                    |
| Data Features   | Identifiers  | Researcher identification                                                                                                                                                                                                                                             |                                                                    |
| Data Features   | Identifiers  | Unique ID for experiments                                                                                                                                                                                                                                             |                                                                    |
| Data Features   | Identifiers  | Unique ID for samples                                                                                                                                                                                                                                                 |                                                                    |
| Data Features   | Identifiers  | Link data and interpretation                                                                                                                                                                                                                                          |                                                                    |
| Data Features   | Provenance   | Display provenance of data                                                                                                                                                                                                                                            |                                                                    |
| Data Features   | Provenance   | Provenance of structures                                                                                                                                                                                                                                              |                                                                    |
| Data Features   | Provenance   | See algorithm/program used to produce data                                                                                                                                                                                                                            |                                                                    |
| Data Features   | Provenance   | See how datasets are reused                                                                                                                                                                                                                                           |                                                                    |
| Data Features   | Provenance   | Tools to capture provenance                                                                                                                                                                                                                                           |                                                                    |
| Domain Features | Based        | Chemical/Molecules                                                                                                                                                                                                                                                    | Automatic chemical recognition                                     |
| Domain Features | Based        | Chemical/Molecules                                                                                                                                                                                                                                                    | Global database of chemical values                                 |
| Domain Features | Based        | Chemical/Molecules                                                                                                                                                                                                                                                    | Handle reagents                                                    |
| Domain Features | Based        | Chemical/Molecules                                                                                                                                                                                                                                                    | Import reaction                                                    |
| Domain Features | Based        | Chemical/Molecules                                                                                                                                                                                                                                                    | Inbuilt understanding of molecules                                 |
| Domain Features | Based        | Chemical/Molecules                                                                                                                                                                                                                                                    | Include material information                                       |
| Domain Features | Based        | Chemical/Molecules                                                                                                                                                                                                                                                    | Standard list of instruments and reagents (remove instrument bits) |
| Domain Features | Based        | Chemical/Molecules                                                                                                                                                                                                                                                    | Table of contents for specific reaction schemes                    |

|                 |       |                                 |                                                                                                |
|-----------------|-------|---------------------------------|------------------------------------------------------------------------------------------------|
| Domain Features | Based | Default Lists                   | Create default values                                                                          |
| Domain Features | Based | Default Lists                   | Global database of chemical values                                                             |
| Domain Features | Based | Default Lists                   | List of data resources                                                                         |
| Domain Features | Based | Default Lists                   | Standard list of instruments and reagents (remove instrument bits)                             |
| Domain Features | Based | Equipment Interface             | Automatically capture data from instrument and upload to experiment                            |
| Domain Features | Based | Equipment Interface             | Full availability of all sources, from firmware upwards for all devices and full open hardware |
| Domain Features | Based | Equipment Interface             | Interface with equipment                                                                       |
| Domain Features | Based | Equipment Interface             | Link to instrument descriptions to view instructions                                           |
| Domain Features | Based | Equipment Interface             | Link to instruments                                                                            |
| Domain Features | Based | Equipment Interface             | Provide list of available equipment                                                            |
| Domain Features | Based | Equipment Interface             | Remote control of instruments                                                                  |
| Domain Features | Based | Equipment Interface             | Standard list of instruments and reagents (remove reagents bit)                                |
| Domain Features | Based | Experiment Planning / Recording | Add dates to experiments                                                                       |
| Domain Features | Based | Experiment Planning / Recording | Add titles to experiments                                                                      |
| Domain Features | Based | Experiment Planning / Recording | Capture experiment conditions                                                                  |
| Domain Features | Based | Experiment Planning / Recording | Copy and modify plan                                                                           |
| Domain Features | Based | Experiment Planning / Recording | Create experiment plan                                                                         |
| Domain Features | Based | Experiment Planning / Recording | Facilitate different experiments                                                               |
| Domain Features | Based | Experiment Planning / Recording | Keeping track of what environments and simulation parameters I've used for what results        |
| Domain Features | Based | Experiment Planning / Recording | Mark experiments as completed                                                                  |
| Domain Features | Based | Experiment Planning / Recording | Protocols                                                                                      |

|                 |       |                                 |                                                                    |
|-----------------|-------|---------------------------------|--------------------------------------------------------------------|
| Domain Features | Based | Experiment Planning / Recording | Provide full environment details for data generation               |
| Domain Features | Based | Experiment Planning / Recording | Record experiment at each stage                                    |
| Domain Features | Based | Experiment Planning / Recording | Record experiment conditions                                       |
| Domain Features | Based | Experiment Planning / Recording | Record observations                                                |
| Domain Features | Based | Experiment Planning / Recording | ReCreate experimental conditions for verification                  |
| Domain Features | Based | Experiment Planning / Recording | Show experiment status                                             |
| Domain Features | Based | Health & Safety                 | Add safety information                                             |
| Domain Features | Based | Health & Safety                 | Automatically flag hazardous chemicals                             |
| Domain Features | Based | Health & Safety                 | Automatically populate experiment record with risk assessment info |
| Domain Features | Based | Health & Safety                 | Create risk phrase vocabulary                                      |
| Domain Features | Based | Health & Safety                 | Flag dangerous chemicals                                           |
| Domain Features | Based | Health & Safety                 | Index of COSHH materials                                           |
| Domain Features | Based | Health & Safety                 | Link to safety information                                         |
| Domain Features | Based | Health & Safety                 | Review safety information                                          |
| Domain Features | Based | Health & Safety                 | Risk assessment inclusion                                          |
| Domain Features | Based | LIMS/ELN                        | Link to Chemical Inventory Website                                 |
| Domain Features | Based | LIMS/ELN                        | Link to ELN                                                        |
| Domain Features | Based | LIMS/ELN                        | Link to LIMS                                                       |
| Domain Features | Based | LIMS/ELN                        | Link to materials inventory system                                 |
| Domain Features | Based | Link to domain-based databases  | Link to domain databases                                           |
| Domain Features | Based | Link to domain-based databases  | Automatically link to external chemistry resources                 |
| Domain Features | Based | Link to domain-based software   | Link to domain software                                            |

|                  |       |                               |                                                                                                    |
|------------------|-------|-------------------------------|----------------------------------------------------------------------------------------------------|
| Domain Features  | Based | Link to domain-based software | Interface between notebook and domain software                                                     |
| Domain Features  | Based | Link to domain-based software | Interface with chemspider                                                                          |
| Domain Features  | Based | Link to domain-based software | Link to ChemDraw                                                                                   |
| Domain Features  | Based | Link to domain-based software | Link to SciFinder                                                                                  |
| Generic Features |       | API Access                    | API / CMD access                                                                                   |
| Generic Features |       | Automation Capabilities       | Update links                                                                                       |
| Generic Features |       | Automation Capabilities       | Automate deletion of files of data that should not be published because of errors (e.g. in input). |
| Generic Features |       | Automation Capabilities       | Automatic data cleaning/detecting faulty data                                                      |
| Generic Features |       | Automation Capabilities       | Automatic processing and formatting                                                                |
| Generic Features |       | Automation Capabilities       | Automatic updates of DRN                                                                           |
| Generic Features |       | Automation Capabilities       | Automation of routine tasks.                                                                       |
| Generic Features |       | Automation Capabilities       | Capture exploratory analysis Automatically                                                         |
| Generic Features |       | Automation Capabilities       | Dropbox-esque features (automatic data update)                                                     |
| Generic Features |       | Automation Capabilities       | Extract metadata associated with research data                                                     |
| Generic Features |       | General                       | Access planning, notes, data and analysis in one place                                             |
| Generic Features |       | General                       | Easy to use systems that play well with one another                                                |
| Generic Features |       | General                       | Interoperable services                                                                             |
| Generic Features |       | General                       | Scalable                                                                                           |
| Generic Features |       | General                       | Simple to install                                                                                  |
| Generic Features |       | General                       | Simple to use                                                                                      |
| Generic Features |       | General                       | Simplified login (without multiple passwords)                                                      |
| Generic Features |       | General                       | Straightforward and transparent processes                                                          |
| Generic Features |       | General                       | User centric design                                                                                |
| Generic Features |       | GUI                           | GUI access                                                                                         |
| Generic Features |       | Localisation                  | Language support                                                                                   |
| Generic Features |       | Localisation                  | See dates in appropriate timezones                                                                 |
| Generic Features |       | Remote Access                 | Access from all locations                                                                          |
| Generic Features |       | Remote Access                 | Access on low bandwidth systems                                                                    |
| Generic Features |       | Remote Access                 | Remote desktop access to systems                                                                   |
| Generic Features |       | Remote Access                 | synchronise across multiple devices                                                                |
| Generic Features |       | Remote Access                 | Use DRN offline                                                                                    |
| Generic Features |       | Synchronisation               | Open several things simultaneously                                                                 |
| Generic Features |       | Synchronisation               | Upload large numbers of files simultaneously                                                       |
| Generic Features |       | Synchronisation               | View multiple data/notes from different experiments                                                |

|                          |                        |                                                                                                                                                                                                          |
|--------------------------|------------------------|----------------------------------------------------------------------------------------------------------------------------------------------------------------------------------------------------------|
| Metadata, Semantics & AI | AI Tools Integration / | Analyse Data                                                                                                                                                                                             |
| Metadata, Semantics & AI | AI Tools Integration / | Input search data into AI/ML workflows                                                                                                                                                                   |
| Metadata, Semantics & AI | AI Tools Integration / | Provide large datasets for ML use                                                                                                                                                                        |
| Metadata, Semantics & AI | AI Tools Integration / | Redirect AI from producing better models to do some of the heavy lifting in data wrangling                                                                                                               |
| Metadata, Semantics & AI | AI Tools Integration / | Smoother integration of ml packages with existing data.                                                                                                                                                  |
| Metadata, Semantics & AI | AI Tools Integration / | Store ML training data                                                                                                                                                                                   |
| Metadata, Semantics & AI | Metadata               | Automated metadata creation & extraction (e.g. instrument settings, Code parameters, timestamps)                                                                                                         |
| Metadata, Semantics & AI | Metadata               | Domain and general metadata                                                                                                                                                                              |
| Metadata, Semantics & AI | Metadata               | Experiment metadata                                                                                                                                                                                      |
| Metadata, Semantics & AI | Metadata               | Extract metadata associated with research data                                                                                                                                                           |
| Metadata, Semantics & AI | Metadata               | Hierarchical metadata                                                                                                                                                                                    |
| Metadata, Semantics & AI | Metadata               | Metadata collection at source                                                                                                                                                                            |
| Metadata, Semantics & AI | Metadata               | Metadata for samples                                                                                                                                                                                     |
| Metadata, Semantics & AI | Metadata               | Metadata in structured form                                                                                                                                                                              |
| Metadata, Semantics & AI | Metadata               | Metadata knowledge graph                                                                                                                                                                                 |
| Metadata, Semantics & AI | Metadata               | Prepopulate metadata with specific vocabulary or predefined metadata schema                                                                                                                              |
| Metadata, Semantics & AI | Metadata               | Standard metadata and headers to data                                                                                                                                                                    |
| Metadata, Semantics & AI | Metadata               | Store metadata                                                                                                                                                                                           |
| Metadata, Semantics & AI | Metadata               | Structure as required metadata (where appropriate)                                                                                                                                                       |
| Metadata, Semantics & AI | Metadata               | Support variety of metadata formats                                                                                                                                                                      |
| Metadata, Semantics & AI | Metadata               | View others metadata in tag cloud                                                                                                                                                                        |
| Metadata, Semantics & AI | Semantics              | Advanced Semantic Search (Filtered Search)                                                                                                                                                               |
| Metadata, Semantics & AI | Semantics              | Automatically link together related experiments                                                                                                                                                          |
| Metadata, Semantics & AI | Semantics              | Coherent standardisation of semantisation of materials data and processes to reach interaoperability especially across data from electronic atomistic and mesoscopic scales experiments and simulations. |



|                          |                 |                                                                                                                                                                                                                                                                                                                                               |
|--------------------------|-----------------|-----------------------------------------------------------------------------------------------------------------------------------------------------------------------------------------------------------------------------------------------------------------------------------------------------------------------------------------------|
| Metadata, Semantics & AI | Semantics       | Inferences for similar projects                                                                                                                                                                                                                                                                                                               |
| Metadata, Semantics & AI | Semantics       | Inferences for the same molecules of reactions                                                                                                                                                                                                                                                                                                |
| Metadata, Semantics & AI | Semantics       | Link everything together for me                                                                                                                                                                                                                                                                                                               |
| Metadata, Semantics & AI | Semantics       | Link files / images / data                                                                                                                                                                                                                                                                                                                    |
| Metadata, Semantics & AI | Semantics       | Link raw, intermediate and analysed data                                                                                                                                                                                                                                                                                                      |
| Metadata, Semantics & AI | Semantics       | Link related notebooks                                                                                                                                                                                                                                                                                                                        |
| Metadata, Semantics & AI | Semantics       | Link to measurement vocabularies                                                                                                                                                                                                                                                                                                              |
| Metadata, Semantics & AI | Semantics       | Link to ontologies                                                                                                                                                                                                                                                                                                                            |
| Metadata, Semantics & AI | Semantics       | More semantics. An easily searchable keywords lookup tool, that records the semantic meaning of the selected keywords. This would enable joined up research, without requiring researchers to understand ontologies. This should be used when publishing papers in addition to data, so it is easier to identify appropriate papers and data. |
| Metadata, Semantics & AI | Semantics       | Ontology driven workflows                                                                                                                                                                                                                                                                                                                     |
| Metadata, Semantics & AI | Semantics       | Prepopulate DRN with vocabulary or link to information system so links are Created                                                                                                                                                                                                                                                            |
| Metadata, Semantics & AI | Semantics       | Semantic annotations                                                                                                                                                                                                                                                                                                                          |
| Metadata, Semantics & AI | Semantics       | Tag / classify experiments                                                                                                                                                                                                                                                                                                                    |
| Metadata, Semantics & AI | Semantics       | Tag / classify notes                                                                                                                                                                                                                                                                                                                          |
| Metadata, Semantics & AI | Templates       | Create and use templates (public and private)                                                                                                                                                                                                                                                                                                 |
| Metadata, Semantics & AI | Templates       | Create flows from a list of standard components                                                                                                                                                                                                                                                                                               |
| Metadata, Semantics & AI | Templates       | Use and Reuse stored models                                                                                                                                                                                                                                                                                                                   |
| Notebooking Features     | Content support | Annotations and highlights                                                                                                                                                                                                                                                                                                                    |
| Notebooking Features     | Content support | Audio files                                                                                                                                                                                                                                                                                                                                   |
| Notebooking Features     | Content support | Automatic handwriting recognition                                                                                                                                                                                                                                                                                                             |
| Notebooking Features     | Content support | Bar Codes/QR Codes for sample / experiment                                                                                                                                                                                                                                                                                                    |
| Notebooking Features     | Content support | Calculations / Formulas / Equations                                                                                                                                                                                                                                                                                                           |
| Notebooking Features     | Content support | Checklist with links                                                                                                                                                                                                                                                                                                                          |
| Notebooking Features     | Content support | Copy sketches into notebook                                                                                                                                                                                                                                                                                                                   |
| Notebooking Features     | Content support | Data/resources open in correct software                                                                                                                                                                                                                                                                                                       |
| Notebooking Features     | Content support | Facilitate sketches and drawing                                                                                                                                                                                                                                                                                                               |
| Notebooking Features     | Content support | Facilitate tables                                                                                                                                                                                                                                                                                                                             |
| Notebooking Features     | Content support | Free text entry                                                                                                                                                                                                                                                                                                                               |

|                      |                                |                                                                       |
|----------------------|--------------------------------|-----------------------------------------------------------------------|
| Notebooking Features | Content support                | Graph display of data                                                 |
| Notebooking Features | Content support                | Handwritten notes                                                     |
| Notebooking Features | Content support                | Import literature source                                              |
| Notebooking Features | Content support                | Include reaction scheme                                               |
| Notebooking Features | Content support                | Include structural representations (2D and 3D)                        |
| Notebooking Features | Content support                | Integrate / store: Excel, Word, PDFs, Pictures,                       |
| Notebooking Features | Content support                | Numerical entry                                                       |
| Notebooking Features | Content support                | Photos / images                                                       |
| Notebooking Features | Content support                | Postit notes                                                          |
| Notebooking Features | Content support                | Record timings                                                        |
| Notebooking Features | Content support                | Support complex images (giga-pixel, z-stacked, hyperspectral imaging) |
| Notebooking Features | Content support                | Support obsolete file formats (future/past proofing)                  |
| Notebooking Features | Content support                | Text recognition                                                      |
| Notebooking Features | Content support                | Thumbnails of documents, graphs etc.                                  |
| Notebooking Features | Content support                | Timelines                                                             |
| Notebooking Features | Content support                | TODO Lists                                                            |
| Notebooking Features | Content support                | Videos                                                                |
| Notebooking Features | Interaction / Access           | As easy to write in as a paper notebook                               |
| Notebooking Features | Interaction / Access           | Both human and machine access                                         |
| Notebooking Features | Interaction / Access           | Digital pen integration                                               |
| Notebooking Features | Interaction / Access           | Hands free/voice control                                              |
| Notebooking Features | Interaction / Access           | Tablet/Smartphone compliant                                           |
| Notebooking Features | Interaction / Access           | Usable in the lab like a paper notebook                               |
| Notebooking Features | Interaction / Access           | Voice Capture                                                         |
| Notebooking Features | Interaction / Access           | Web based/Platform Independent                                        |
| Notebooking Features | Link to other files            | Link to Code                                                          |
| Notebooking Features | Link to other files            | Link to data from other sources                                       |
| Notebooking Features | Link to other files            | Link to external dataset                                              |
| Notebooking Features | Link to other files            | Link to other experiments                                             |
| Notebooking Features | Organisation / Reconfiguration | Contents Table / Overview Screen                                      |
| Notebooking Features | Organisation / Reconfiguration | Group together team members and notebooks by topic                    |
| Notebooking Features | Organisation / Reconfiguration | Re-orderable list of work                                             |
| Notebooking Features | Organisation / Reconfiguration | Timeline of experiments / studies by team/project/researcher/topic    |
| Notebooking Features | Organisation / Reconfiguration | View experiments in last edited order                                 |

|                               |                              |                                                                      |
|-------------------------------|------------------------------|----------------------------------------------------------------------|
| Notebooking Features          | Paper Integration            | Digitise paper based legacy data                                     |
| Notebooking Features          | Paper Integration            | Handwritten notes                                                    |
| Notebooking Features          | Paper Integration            | Link with paper notebooks                                            |
| Notebooking Features          | Paper Integration            | Scan in documents                                                    |
| Notebooking Features          | Paper Integration            | Transform/migrate digital legacy data                                |
| Notebooking Features          | Referencing & Literature     | Access to reference quality data                                     |
| Notebooking Features          | Referencing & Literature     | Add Code citations                                                   |
| Notebooking Features          | Referencing & Literature     | Add data citations                                                   |
| Notebooking Features          | Referencing & Literature     | Easy access to published work                                        |
| Notebooking Features          | Referencing & Literature     | Export literature references from notebooks for use in formal report |
| Notebooking Features          | Referencing & Literature     | Extract data Automatically from legacy literature                    |
| Notebooking Features          | Referencing & Literature     | Import literature source                                             |
| Notebooking Features          | Referencing & Literature     | Journal article links                                                |
| Notebooking Features          | Referencing & Literature     | Link to reference managers                                           |
| Notebooking Features          | Referencing & Literature     | Link to reference managers                                           |
| Notebooking Features          | Referencing & Literature     | Share literature resource                                            |
| Notebooking Features          | Referencing & Literature     | Store and view literature sources                                    |
| Notebooking Features          | Referencing & Literature     | Suggested citations                                                  |
| Notebooking Features          | Word Processing              | Cut and paste between windows                                        |
| Notebooking Features          | Word Processing              | Smart cut and paste (e.g. matching field names)                      |
| Notebooking Features          | Word Processing              | Spell Checker                                                        |
| Notebooking Features          | Word Processing              | Word processing                                                      |
| Notebooking Features          | Word Processing              | WYSIWIG Editor for notes                                             |
| Publishing & Sharing Features | Documentation & Instructions | Create instructions                                                  |
| Publishing & Sharing Features | Documentation & Instructions | Documentation for techniques                                         |
| Publishing & Sharing Features | Documentation & Instructions | Share instructions                                                   |
| Publishing & Sharing Features | Documentation & Instructions | User documentation                                                   |
| Publishing & Sharing Features | DOIs                         | DOI generation / permanent links for data                            |

|                               |              |                                                                      |
|-------------------------------|--------------|----------------------------------------------------------------------|
| Publishing & Sharing Features | Export       | Common data standards for import/export                              |
| Publishing & Sharing Features | Export       | Downloads/Printing                                                   |
| Publishing & Sharing Features | Export       | Export all components of work (e.g. data, Code, graphics)            |
| Publishing & Sharing Features | Export       | Export data to chemspider                                            |
| Publishing & Sharing Features | Export       | Export full notebook                                                 |
| Publishing & Sharing Features | Export       | Export in multiple formats                                           |
| Publishing & Sharing Features | Export       | Export literature references from notebooks for use in formal report |
| Publishing & Sharing Features | Export       | Export structures in compatible file formats                         |
| Publishing & Sharing Features | Export       | Migration tools                                                      |
| Publishing & Sharing Features | Export       | Export thesis                                                        |
| Publishing & Sharing Features | Licensing    | Create Code licenses                                                 |
| Publishing & Sharing Features | Licensing    | Create data licenses                                                 |
| Publishing & Sharing Features | Open Access  | Default model for making data open once published                    |
| Publishing & Sharing Features | Open Access  | Free scientific articles                                             |
| Publishing & Sharing Features | Open Access  | Use open source software (where possible)                            |
| Publishing & Sharing Features | Open Access  | Lower Costs                                                          |
| Publishing & Sharing Features | Publishing   | Create package of notes/data/Code                                    |
| Publishing & Sharing Features | Publishing   | Generate report button                                               |
| Publishing & Sharing Features | Publishing   | Methods for publishing data                                          |
| Publishing & Sharing Features | Publishing   | Produce paper publication                                            |
| Publishing & Sharing Features | Publishing   | Thesis generation button                                             |
| Publishing & Sharing Features | Publishing   | View reports                                                         |
| Publishing & Sharing Features | Publishing   | Write report                                                         |
| Publishing & Sharing Features | Repositories | Download data from repository                                        |
| Publishing & Sharing Features | Repositories | Find add and run Code from online repository                         |

|                               |                                          |                                                                                                  |
|-------------------------------|------------------------------------------|--------------------------------------------------------------------------------------------------|
| Publishing & Sharing Features | Repositories                             | Upload Code to repository                                                                        |
| Publishing & Sharing Features | Repositories                             | Upload data to repository                                                                        |
| Publishing & Sharing Features | Repositories                             | Upload notebooks to repository                                                                   |
| Publishing & Sharing Features | Researcher Attribution                   | Attribution for combined datasets                                                                |
| Publishing & Sharing Features | Researcher Attribution                   | Recognition of researcher contribution to data                                                   |
| Publishing & Sharing Features | Sharing                                  | Established data sharing expectations / policies                                                 |
| Publishing & Sharing Features | Sharing                                  | Share data for reuse                                                                             |
| Publishing & Sharing Features | Sharing                                  | Share draft data with collaborators                                                              |
| Publishing & Sharing Features | Sharing                                  | Share plan                                                                                       |
| Publishing & Sharing Features | Sharing                                  | Share with other institutions                                                                    |
| Publishing & Sharing Features | Sharing                                  | Share work with collaborators                                                                    |
| Publishing & Sharing Features | Sharing                                  | Shareable files                                                                                  |
| Publishing & Sharing Features | Sharing                                  | Shared electronic notebooks                                                                      |
| Publishing & Sharing Features | Sharing                                  | Shared files / notebooks                                                                         |
| Publishing & Sharing Features | Sharing                                  | Sharing and accessing large data                                                                 |
| Publishing & Sharing Features | Social Media                             | Integrate with Social Media                                                                      |
| Searching                     | Characteristics Search                   | Find datasets with specific characteristics                                                      |
| Searching                     | Domain Search                            | Making it easier to locate the necessary information and source on studied materials.            |
| Searching                     | Domain Search                            | Search by structure                                                                              |
| Searching                     | Domain Search                            | Search experiment protocols                                                                      |
| Searching                     | Domain Search                            | Searches include reaction schemes                                                                |
| Searching                     | Indexing                                 | Indexable                                                                                        |
| Searching                     | Indexing                                 | Make things easier to find.                                                                      |
| Searching                     | Indexing                                 | Uniformity of interfaces to data bases and easily accessible search engines for extracting data. |
| Searching                     | Keyword/Concept Search via Content Types | Describe datasets to enable searching                                                            |
| Searching                     | Keyword/Concept Search via Content Types | Find context for the work                                                                        |

|                         |                                          |                                                |
|-------------------------|------------------------------------------|------------------------------------------------|
| Searching               | Keyword/Concept Search via Content Types | Keyword Search                                 |
| Searching               | Literature Search                        | Literature search                              |
| Searching               | Notebook Search                          | Search notebook discussion forum               |
| Searching               | Notebook Search                          | Search through previous documents of a project |
| Searching               | Notebook Search                          | Searchable data across all notebooks           |
| Searching               | Similarity Search                        | Search for similar data                        |
| Searching               | Similarity Search                        | See related content upon click                 |
| Searching               | Visual Search                            | Search by image                                |
| Searching               | Visual Search                            | Search graphs (visual)                         |
| Training & User Support | Training                                 | Training                                       |
| Training & User Support | User Documentation                       | User Documentation                             |
