# Supplementary material for: Digital research environments: a requirements analysis
Source: Royal Society of Chemistry journal article supplement (doi:10.1039/d2dd00121g), 2023-01-01
Supplement: d2dd00121g2.pdf [file d2dd00121g2.pdf]

## D. Software Categories

In Question 10 of the survey, the participants were asked what other software they used. We took these results and split them up into individual pieces of software, and removed all duplicates. From this we had a list of 209 pieces of software. We categorised these using the categories from our previous software research and identified new categories from the remaining items. Table D. 1 shows a full alphabetised list of the categories and the pieces of software within these categories.

Table D. 1: Full categorised list of software from PSDI Survey Question 10

| Category                                 | Software                                            |
|------------------------------------------|-----------------------------------------------------|
| CAD Software                             | Autodesk inventor                                   |
| CAD Software                             | onshape.com                                         |
| Chemical Database & Informatics Software | Chemistry Open Database                             |
| Chemical Database & Informatics Software | CSD (Cambridge Structural Database)                 |
| Chemical Database & Informatics Software | dragon                                              |
| Chemical Database & Informatics Software | icsd                                                |
| Chemical Database & Informatics Software | mordred                                             |
| Chemical Database & Informatics Software | NIST                                                |
| Chemical Database & Informatics Software | nomad                                               |
| Chemical Database & Informatics Software | openbabel                                           |
| Chemistry Bibliographic Databases        | JabRef                                              |
| Chemistry Bibliographic Databases        | Mendeley                                            |
| Chemistry Bibliographic Databases        | SciFinder                                           |
| Chemistry Bibliographic Databases        | Zenodo                                              |
| Chemistry Bibliographic Databases        | Zotero                                              |
| Coding software                          | Anaconda                                            |
| Coding Software                          | debuggers                                           |
| Coding Software                          | docker engine/swarm                                 |
| Coding Software                          | expo                                                |
| Coding software                          | Fortran                                             |
| Coding Software                          | Git                                                 |
| Coding Software                          | jax                                                 |
| Coding Software                          | kubernetes                                          |
| Coding Software                          | MATLAB                                              |
| Coding Software                          | p4merge                                             |
| Coding Software                          | pandoc Vue.js for building GUIs<br>FastAPI/pydantic |
| Coding Software                          | pymol                                               |
| Coding Software                          | Python                                              |
| Coding Software                          | NumPy                                               |
| Coding Software                          | SciPy                                               |
| Coding Software                          | PyTorch                                             |
| Coding Software                          | R                                                   |
| Coding Software                          | R-chis                                              |
| Coding Software                          | RDkit                                               |

|                               |                                                                                                                            |
|-------------------------------|----------------------------------------------------------------------------------------------------------------------------|
| Coding Software               | ruby and crystal programming languages                                                                                     |
| Coding Software               | Spyder                                                                                                                     |
| Coding Software               | Visual Studio Code                                                                                                         |
| Communication Software        | Gmail                                                                                                                      |
| Communication Software        | Signal                                                                                                                     |
| Communication Software        | Slack                                                                                                                      |
| Communication Software        | Zoom                                                                                                                       |
| Crystallographic Software     | apex4                                                                                                                      |
| Crystallographic Software     | ConQuest                                                                                                                   |
| Crystallographic Software     | Crystal17                                                                                                                  |
| Crystallographic Software     | Crystaldiffract                                                                                                            |
| Crystallographic Software     | Crystalexplorer                                                                                                            |
| Crystallographic Software     | CrystalisPro                                                                                                               |
| Crystallographic Software     | CrystalMaker                                                                                                               |
| Crystallographic Software     | CrystalOptimizer                                                                                                           |
| Crystallographic Software     | CrystalPredictor                                                                                                           |
| Crystallographic Software     | dash                                                                                                                       |
| Crystallographic Software     | DMACRYS                                                                                                                    |
| Crystallographic Software     | encifer                                                                                                                    |
| Crystallographic Software     | gsas                                                                                                                       |
| Crystallographic Software     | IsoDistort (web based, <a href="https://stokes.byu.edu/iso/isodistort.php">https://stokes.byu.edu/iso/isodistort.php</a> ) |
| Crystallographic Software     | Jana2006                                                                                                                   |
| Crystallographic Software     | Match                                                                                                                      |
| Crystallographic Software     | Olex2                                                                                                                      |
| Crystallographic Software     | platon                                                                                                                     |
| Crystallographic Software     | Gsas-II                                                                                                                    |
| Crystallographic Software     | Powder diffraction analysis (GSAS, GSASII, FullProf)                                                                       |
| Crystallographic Software     | PowDLL                                                                                                                     |
| Crystallographic Software     | profex                                                                                                                     |
| Crystallographic Software     | Shelx suite                                                                                                                |
| Crystallographic Software     | Topas                                                                                                                      |
| Crystallographic Software     | webcsd                                                                                                                     |
| Crystallographic Software     | wingx                                                                                                                      |
| Data Visualisation & Analysis | ACD analytical software                                                                                                    |
| Data Visualisation & Analysis | CellProfiler                                                                                                               |
| Data Visualisation & Analysis | CYLView                                                                                                                    |
| Data Visualisation & Analysis | DataWarrior                                                                                                                |
| Data Visualisation & Analysis | gnuplot                                                                                                                    |
| Data Visualisation & Analysis | Grace                                                                                                                      |
| Data Visualisation & Analysis | Gwyddion                                                                                                                   |
| Data Visualisation & Analysis | JMP                                                                                                                        |
| Data Visualisation & Analysis | Mantid                                                                                                                     |
| Data Visualisation & Analysis | MiniTab                                                                                                                    |
| Data Visualisation & Analysis | Origin                                                                                                                     |

|                               |                                             |
|-------------------------------|---------------------------------------------|
| Data Visualisation & Analysis | POV-ray                                     |
| Data Visualisation & Analysis | Spotfire Analyst                            |
| Data Visualisation & Analysis | super flip                                  |
| Data Visualisation & Analysis | VESTA                                       |
| Data Visualisation & Analysis | Veusz                                       |
| Data Visualisation & Analysis | Virscidian LC-MS (and more) software        |
| Data Visualisation & Analysis | WebPlot Digitizer                           |
| Data Visualisation & Analysis | xmgrace                                     |
| Database Software             | ArangoDB                                    |
| Database Software             | Apache Jena Fuseki                          |
| Database Software             | MongoDB                                     |
| Database Software             | MySQL                                       |
| Database Software             | SQL                                         |
| General document processing   | Flare                                       |
| General document processing   | emacs                                       |
| General document processing   | Google Docs                                 |
| General document processing   | jEdit                                       |
| General document processing   | LaTeX                                       |
| General document processing   | Libreoffice                                 |
| General document processing   | Lyx                                         |
| General document processing   | MS Excel                                    |
| General document processing   | MS 365 Suite                                |
| General document processing   | MS PowerPoint                               |
| General document processing   | MS Word                                     |
| General document processing   | OneNote (and on ipad)                       |
| General document processing   | Overleaf                                    |
| General document processing   | PDF Xchange editor                          |
| General document processing   | tex/latex                                   |
| General document processing   | LaTeXIt                                     |
| General document processing   | TeXStudio                                   |
| General document processing   | TexShop                                     |
| Image processing Software     | Adobesuite                                  |
| Image processing Software     | AIPS (Astronomical Image Processing System) |
| Image processing Software     | CORELDraw                                   |
| Image processing Software     | FIJI                                        |
| Image processing Software     | GIMP                                        |
| Image processing Software     | ImageJ                                      |
| Image processing Software     | Inkscape                                    |
| Image processing Software     | paint.NET                                   |
| Image processing Software     | PaintShopPro                                |
| Instrument Control            | ChemStation                                 |
| Instrument Control            | LabVIEW                                     |
| Instrument Control            | Mettler-Toledo iC software suite            |
| Instrument Control            | trios                                       |

|                                           |                                                         |
|-------------------------------------------|---------------------------------------------------------|
| Instrument Control                        | Unchained Labs Automation Studio and associated viewers |
| Machine Learning                          | scikit-learn                                            |
| Machine Learning                          | Tensorflow                                              |
| Molecular Editor Software                 | ChemDraw                                                |
| Molecular Editor Software                 | marvin                                                  |
| Molecular Editor Software                 | Mercury                                                 |
| Molecular Modelling & Simulation Software | Atomic Simulation environment                           |
| Molecular Modelling & Simulation Software | Autodock vina                                           |
| Molecular Modelling & Simulation Software | BioSimSpace                                             |
| Molecular Modelling & Simulation Software | Charmm-Gui                                              |
| Molecular Modelling & Simulation Software | ChimeraX                                                |
| Molecular Modelling & Simulation Software | DL_Poly                                                 |
| Molecular Modelling & Simulation Software | Geant4                                                  |
| Molecular Modelling & Simulation Software | gromacs                                                 |
| Molecular Modelling & Simulation Software | GULP                                                    |
| Molecular Modelling & Simulation Software | Gypsum-DL                                               |
| Molecular Modelling & Simulation Software | Lammps (classical MD)                                   |
| Molecular Modelling & Simulation Software | Materials Studio                                        |
| Molecular Modelling & Simulation Software | MDAnalysis                                              |
| Molecular Modelling & Simulation Software | molten                                                  |
| Molecular Modelling & Simulation Software | nwchem                                                  |
| Molecular Modelling & Simulation Software | OpenEye                                                 |
| Molecular Modelling & Simulation Software | OpenMM                                                  |
| Molecular Modelling & Simulation Software | Ovito (visualisation)                                   |
| Molecular Modelling & Simulation Software | SnapGene                                                |
| Molecular Modelling & Simulation Software | tinker                                                  |
| Molecular Modelling & Simulation Software | VASP                                                    |
| Molecular Modelling & Simulation Software | VMD                                                     |
| Nanostructures Modelling Software         | Aztec                                                   |
| Nanostructures Modelling Software         | Quantum Espresso                                        |
| Organisational Software                   | DropBox                                                 |
| Organisational software                   | Google drive                                            |
| Organisational software                   | iCloud                                                  |
| Organisational Software                   | Mural                                                   |
| Organisational Software                   | Project management                                      |
| Organisational Software                   | slurm                                                   |
| Organisational Software                   | Trello                                                  |
| Other                                     | Adobe Acrobat                                           |
| Other                                     | Agilent                                                 |
| Other                                     | CASA (Common Astronomy Software Applications)           |
| Other                                     | EIMS online mode solver                                 |
| Other                                     | Cytoscape                                               |
| Other                                     | In-house/custom software                                |
| Other                                     | KLayout                                                 |

|                                                    |                                       |
|----------------------------------------------------|---------------------------------------|
| Other                                              | MadGraph                              |
| Other                                              | RNAppbees                             |
| Other                                              | TeamViewer                            |
| Other                                              | UnityMol                              |
| Other                                              | Wolfram Alpha                         |
| Other                                              | Wolfram Mathematica                   |
| Quantum Chemistry and Solid State Physics Software | AlmaBTE                               |
| Quantum Chemistry and Solid State Physics Software | Amber                                 |
| Quantum Chemistry and Solid State Physics Software | BoltzTraP(2)                          |
| Quantum Chemistry and Solid State Physics Software | CASTEP                                |
| Quantum Chemistry and Solid State Physics Software | chemshell                             |
| Quantum Chemistry and Solid State Physics Software | Delphes                               |
| Quantum Chemistry and Solid State Physics Software | Density functional theory (DFT) codes |
| Quantum Chemistry and Solid State Physics Software | ELK                                   |
| Quantum Chemistry and Solid State Physics Software | FHI-aims                              |
| Quantum Chemistry and Solid State Physics Software | gamess                                |
| Quantum Chemistry and Solid State Physics Software | Gaussian                              |
| Quantum Chemistry and Solid State Physics Software | hybrid qm/mm                          |
| Quantum Chemistry and Solid State Physics Software | Lumerical                             |
| Quantum Chemistry and Solid State Physics Software | Molpro                                |
| Quantum Chemistry and Solid State Physics Software | multiwfn                              |
| Quantum Chemistry and Solid State Physics Software | Orca                                  |
| Quantum Chemistry and Solid State Physics Software | siesta                                |
| Quantum Chemistry and Solid State Physics Software | Quantum mechanics software            |
| Quantum Chemistry and Solid State Physics Software | ShengBTE                              |
| Quantum Chemistry and Solid State Physics Software | wxmacmolpld                           |
| Quantum Chemistry and Solid State Physics Software | xtb                                   |
| Simulation (non-chemical)                          | Cluspro                               |
| Simulation (non-chemical)                          | COMSOL                                |
| Simulation (non-chemical)                          | COPASI                                |
| Simulation (non-chemical)                          | Pythia                                |
| Simulation (non-chemical)                          | RNA fold                              |
| Spectroscopic Software                             | CasaXPS                               |
| Spectroscopic Software                             | diffract.eva                          |
| Spectroscopic Software                             | iNMR                                  |
| Spectroscopic Software                             | MassHunter                            |
| Spectroscopic Software                             | MestreNova NMR                        |
| Spectroscopic Software                             | mMass                                 |
| Spectroscopic Software                             | Regress Pro                           |
| Spectroscopic Software                             | spectragryph                          |
| Spectroscopic Software                             | topspin                               |
| Spectroscopic Software                             | turbo mass                            |
| Workflow software                                  | knime                                 |
